# Supplementary material for: Weight Loss Outcomes Associated With Semaglutide Treatment for Patients With Overweight or Obesity
Source: PubMed Central journal article supplement (PMC9486455; doi:10.1001/jamanetworkopen.2022.31982), 2022-09-19
Supplement: jamanetwopen-e2231982-s001.pdf [file jamanetwopen-e2231982-s001.pdf]

## Supplementary Online Content

Ghusn W, De la Rosa A, Sacoto D, et al. Weight loss outcomes associated with semaglutide treatment for patients with overweight or obesity. *JAMA Netw Open*. 2022;5(9):e2231982. doi:10.1001/jamanetworkopen.2022.31982

**eTable 1.** Detailed Exclusion Criteria

**eTable 2.** Maximum Dose of Semaglutide Reached

**eTable 3.** Percentage Weight Change of Patients Taking Semaglutide With/Without Dietitian or Psychologist Visits at 3 and 6 Months

**eFigure 1.** Total Body Weight Loss Percentage (TBWL%) at 3 and 6 Months of Patients Taking Low and High Doses of Subcutaneous Semaglutide

**eFigure 2.** Percentage Weight Change Heterogeneity in Patients Taking Semaglutide at 3 and 6 Months

This supplementary material has been provided by the authors to give readers additional information about their work.

**eTable 1.** Detailed Exclusion Criteria

| <b>Reasons for exclusion</b>                 | <b>Number of patients</b> |
|----------------------------------------------|---------------------------|
| Insurance denial and national shortage, (%)  | 148 (64)                  |
| Previous bariatric procedure, (%)            | 42 (18)                   |
| Less than 3 months on semaglutide, (%)       | 14 (6)                    |
| Multiple active anti-obesity medication, (%) | 13 (6)                    |
| Active malignancy, (%)                       | 6 (3)                     |
| No baseline weight, (%)                      | 4 (2)                     |
| Medical disease affecting weight, (%)        | 3 (1)                     |
| Unknown semaglutide start date, (%)          | 3 (1)                     |
| Total, (%)                                   | 233 (100)                 |

**eTable 2.** Maximum Dose of Semaglutide Reached

| <b>Maximum dose reached</b> | <b>Number of patients, (%)</b> |
|-----------------------------|--------------------------------|
| 0.25 mg                     | 6 (3)                          |
| 0.5 mg                      | 36 (21)                        |
| 1 mg                        | 56 (32)                        |
| 1.7 mg                      | 29 (17)                        |
| 2.4 mg                      | 48 (27)                        |
| Total                       | 175 (100)                      |

**eTable 3.** Percentage Weight Change of Patients Taking Semaglutide With/Without Dietitian or Psychologist Visits at 3 and 6 Months

|                                     | Dietician visits |       |         | Psychologist visits |      |         |
|-------------------------------------|------------------|-------|---------|---------------------|------|---------|
|                                     | Yes              | No    | p-value | Yes                 | No   | p-value |
| <b>Three Months (% weight loss)</b> | -5.9             | -5.9  | 0.98    | -5.7                | -5.9 | 0.86    |
| <b>Six Months (% weight loss)</b>   | -9.8             | -11.4 | 0.23    | -10.3               | -11  | 0.68    |

**eFigure 1.** Total Body Weight Loss Percentage (TBWL%) at 3 and 6 Months of Patients Taking Low and High Doses of Subcutaneous Semaglutide

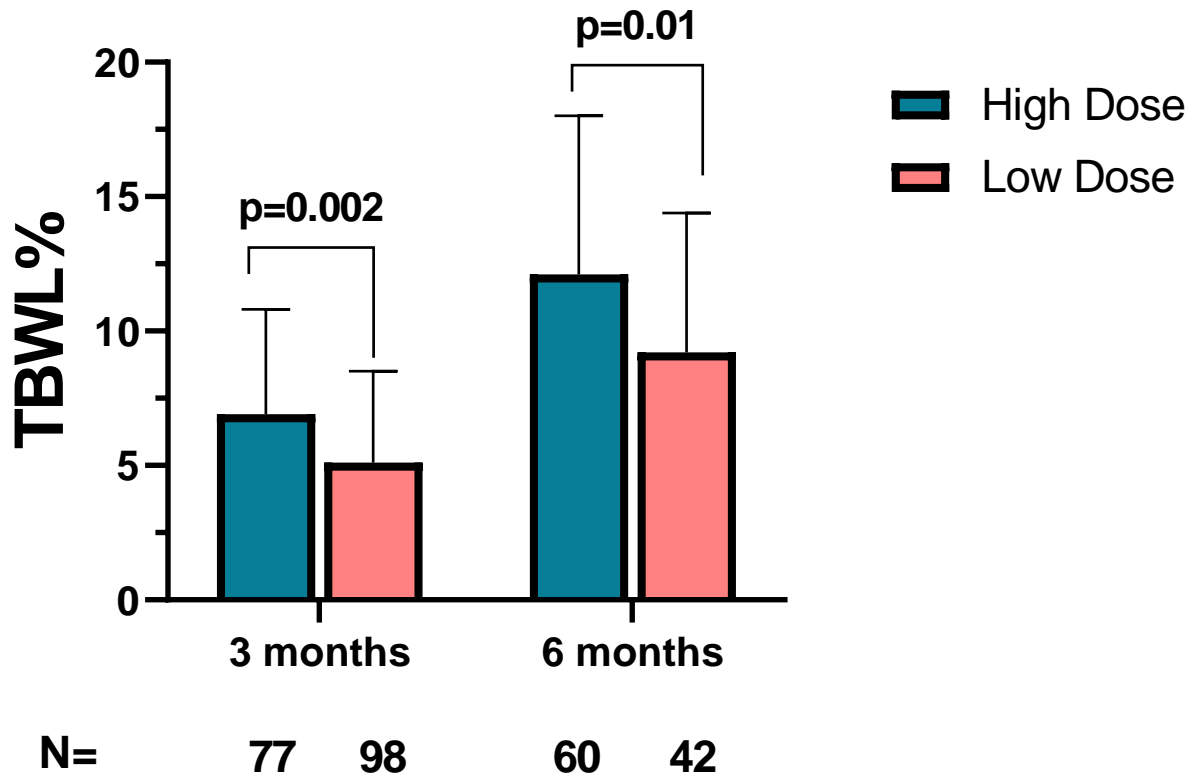

**eFigure 2.** Percentage Weight Change Heterogeneity in Patients Taking Semaglutide at 3 and 6 Months

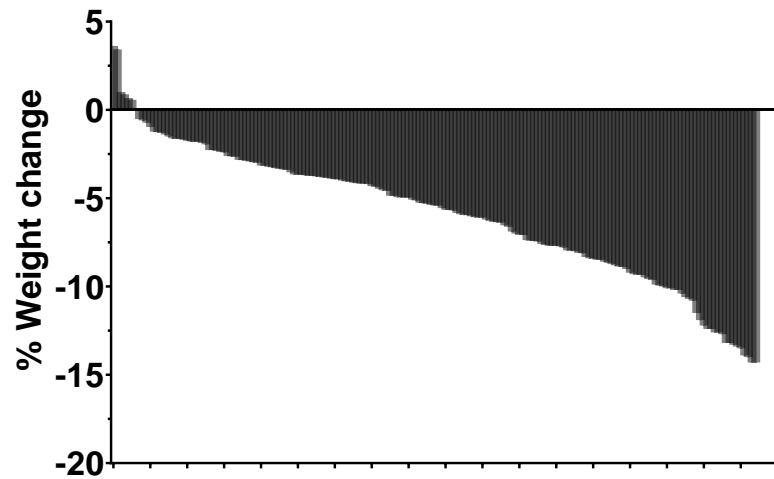

**Patients (in 3 months)**

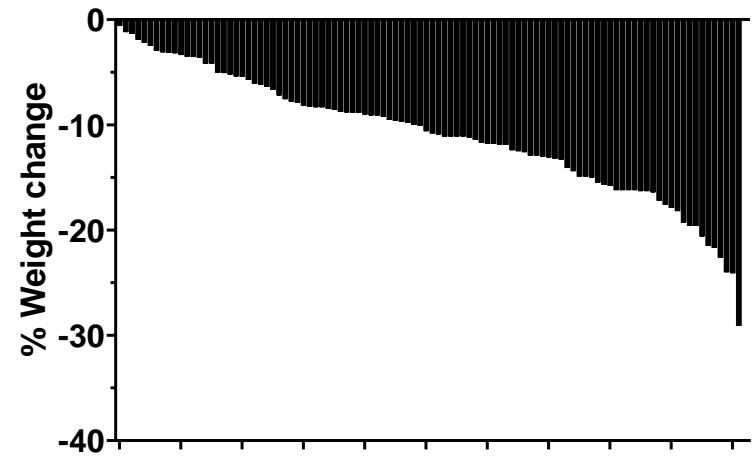

**Patients (in 6 months)**
